# Supplementary material
Source: PubMed Central journal article supplement (PMC6815169)

# Supplementary Information for

## **Divergent roles of astrocytic versus neuronal EAAT2 deficiency on cognition and overlap with aging and Alzheimer's molecular signatures**

**Abhijeet Sharma<sup>1,2\*</sup>, Syed Faraz Kazim<sup>1,2\*</sup>, Chloe S. Larson<sup>1,2,3</sup>, Aarthi Ramakrishnan<sup>2</sup>, Jason D. Gray<sup>3</sup>, Paul A. Rosenberg<sup>4,5</sup>, Li Shen<sup>2</sup>, Bruce S. McEwen<sup>3,6</sup> and Ana C. Pereira<sup>1,2,6</sup>**

<sup>1</sup>Department of Neurology, Icahn School of Medicine, Mount Sinai, New York, NY 10029

<sup>2</sup>Fishberg Department of Neuroscience, Friedman Brain Institute, Icahn School of Medicine at Mount Sinai, New York, NY 10029

<sup>3</sup>Laboratory of Neuroendocrinology, The Rockefeller University, New York, NY 10065

<sup>4</sup>Department of Neurology and the F.M. Kirby Neurobiology Center, Boston Children's Hospital, Boston, Massachusetts 02115

<sup>5</sup>Program in Neuroscience, Harvard Medical School, Boston, Massachusetts 02115

<sup>6</sup>Corresponding author

Ana C. Pereira, MD,  
Assistant Professor of Neurology and Neuroscience,  
Icahn School of Medicine at Mount Sinai,  
1468 Madison Avenue,  
Annenberg Building, 20th Floor, RM 20-02A,  
New York, NY 10029.  
Email: [ana.pereira@mssm.edu](mailto:ana.pereira@mssm.edu)

Bruce S. McEwen, Ph.D.  
Alfred E. Mirsky Professor Head, Harold and Margaret Milliken Hatch Laboratory of  
Neuroendocrinology  
The Rockefeller University  
1230 York Avenue New York, NY 10065  
Email: [Bruce.McEwen@mail.rockefeller.edu](mailto:Bruce.McEwen@mail.rockefeller.edu)

**This PDF file includes:**

**Figs. S1 to S4**

**Fig. S1. Conditional heterozygous astrocytic EAAT2 knockout (gfap-Cre<sup>+</sup> EAAT2<sup>Δ/+</sup>) mice exhibited significant reduction (22%) in EAAT2 expression while homozygous neuronal EAAT2 knock out (syn-Cre<sup>+</sup> EAAT2<sup>-/-</sup>) mice displayed a non-significant reduction (14%) in EAAT2 expression.**

**a,** Representative protein immunoblots from cortical plasma membrane vesicle fractions of gfap-Cre<sup>+</sup> EAAT2<sup>Δ/+</sup> and gfap-Cre<sup>-</sup> EAAT2<sup>+/+</sup> mice probed with antibodies against EAAT2 and βactin.

**b,** Quantification of Western blot data are shown as mean ± S.E.M. and are based on gfap-Cre<sup>+</sup> EAAT2<sup>Δ/+</sup> (n = 6) and gfap-Cre<sup>-</sup> EAAT2<sup>+/+</sup> (n = 5).

**c,** Representative protein immunoblots from cortical plasma membrane vesicle fractions of syn-Cre<sup>+</sup> EAAT2<sup>-/-</sup> and syn-Cre<sup>-</sup> EAAT2<sup>+/+</sup> mice probed with antibodies against EAAT2 and βactin.

**d,** Quantification of Western blot data are shown as mean ± S.E.M. and are based on syn-Cre<sup>+</sup> EAAT2<sup>-/-</sup> (n = 5) and syn-Cre<sup>-</sup> EAAT2<sup>+/+</sup> (n = 5).

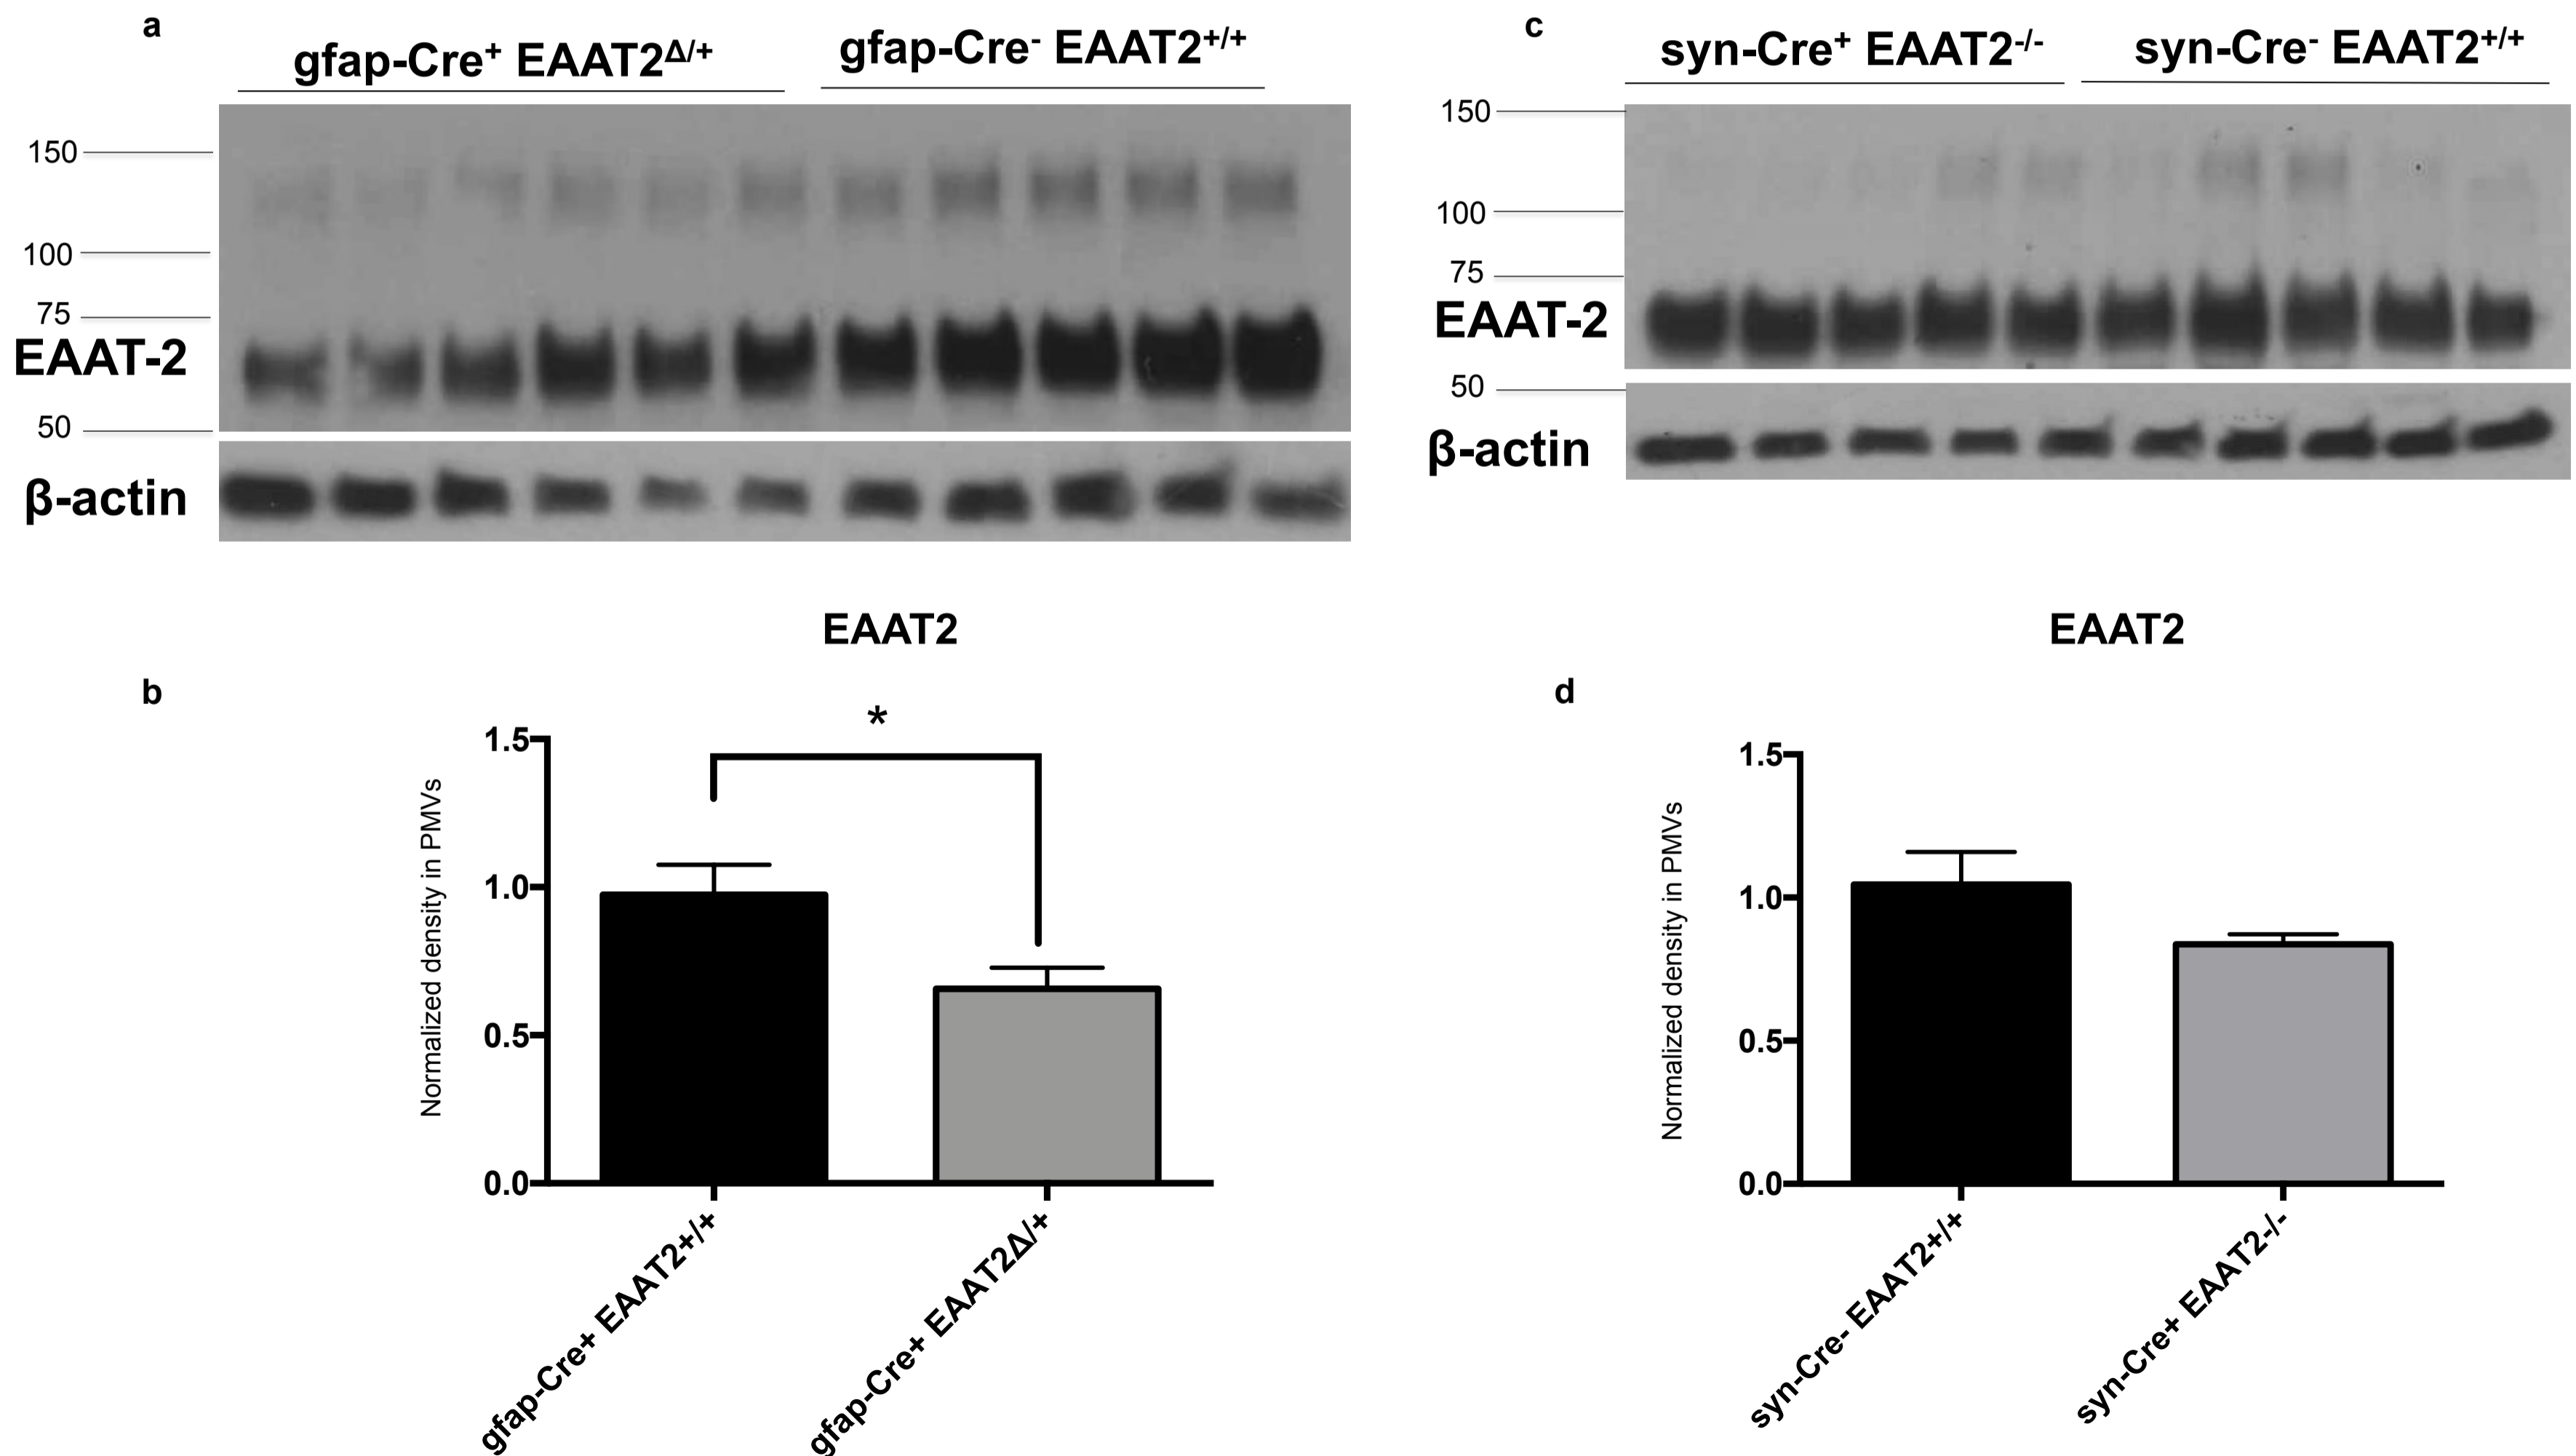

**Fig. S2. Conditional heterozygous astrocytic EAAT2 knockout (gfap-Cre<sup>+</sup> EAAT2<sup>Δ/+</sup>) and homozygous neuronal EAAT2 knock out (syn-Cre<sup>+</sup> EAAT2<sup>-/-</sup>) mice do not display changes in expression of synaptic markers.**

**a**, Representative protein immunoblots from plasma membrane vesicle fractions of gfap-Cre<sup>+</sup> EAAT2<sup>Δ/+</sup> and gfap-Cre<sup>-</sup> EAAT2<sup>+/+</sup> mice probed with antibodies against synaptophysin, PSD95 and βactin.

**b,c** Quantification of Western blot data are shown as mean ± S.E.M. and are based on gfap-Cre<sup>+</sup> EAAT2<sup>Δ/+</sup> (n = 6) and gfap-Cre<sup>-</sup> EAAT2<sup>+/+</sup> (n = 5).

**d**, Representative protein immunoblots from plasma membrane vesicle fractions of syn-Cre<sup>+</sup> EAAT2<sup>-/-</sup> and syn-Cre<sup>-</sup> EAAT2<sup>+/+</sup> mice probed with antibodies against synaptophysin, PSD95 and βactin.

**e,f** Quantification of Western blot data are shown as mean ± S.E.M. and are based on syn-Cre<sup>+</sup> EAAT2<sup>-/-</sup> (n = 5) and syn-Cre<sup>-</sup> EAAT2<sup>+/+</sup> (n = 5).

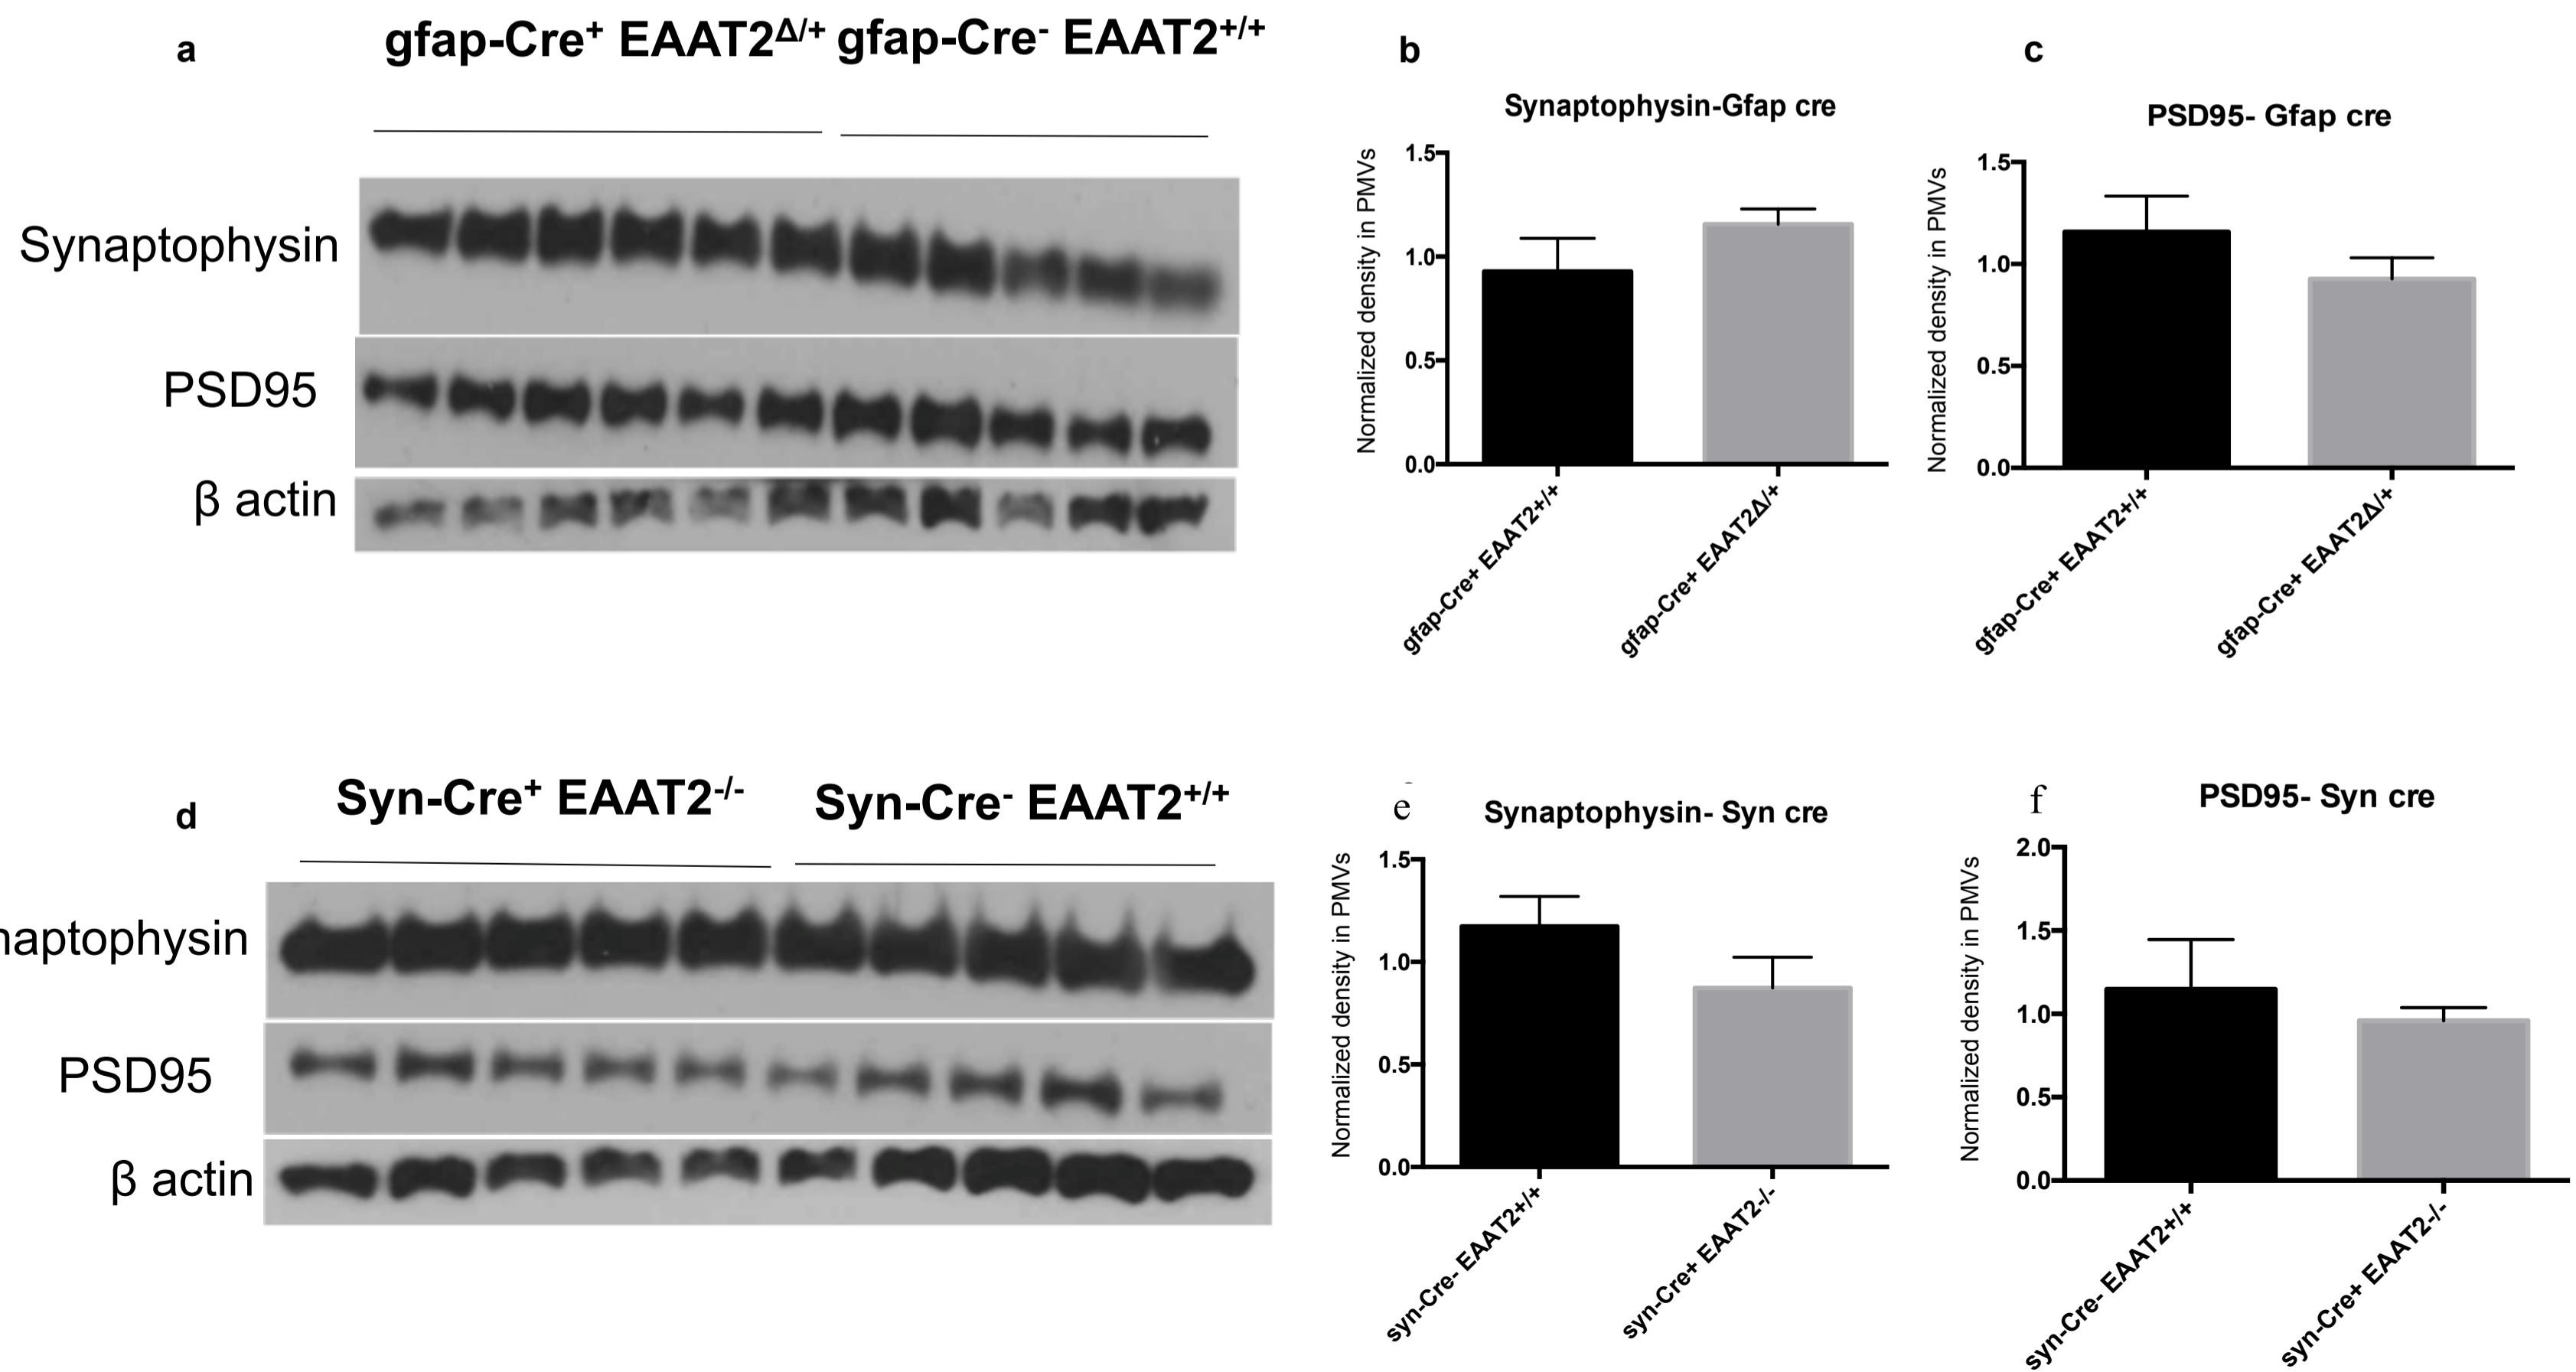

**Fig. S3. Age-matched gfap-Cre<sup>+</sup> control (without EAAT2 deletion) mice did not exhibit deficit in spatial reference memory in Y-maze and MWM at 13 and 17 months of age respectively.**

**a**, In the acquisition trial of Y-maze at 13 months of age, gfap-Cre<sup>+</sup> control (without EAAT2 deletion) mice explored Start arm (SA) and Familiar arm (FA) equally.  $p = 0.28$

**b**, In the retention trial, gfap-Cre<sup>+</sup> control mice spent more time exploring the novel arm (NA) than FA, suggesting absence of any spatial reference memory deficit at 13 months of age.  $p = 0.0134$

**c**, Spatial learning curve of gfap-Cre<sup>+</sup> control mice in MWM. The escape latency during the training phase (Blocks 1-4, D1-8) of gfap-Cre<sup>+</sup> control mice. The gfap-Cre<sup>+</sup> control mice exhibited statistically significant spatial learning over the learning trials ( $F(2.6) = 5.854$ ,  $p = 0.0018$ , repeated measures two-way ANOVA).

**d**, Spatial reference memory evaluation of gfap-Cre<sup>+</sup> control mice in MWM. The amount of time spent in TQ by gfap-Cre<sup>+</sup> control mice in the probe trial (D9, 24-hr retention trial) is shown.

The data are shown as mean  $\pm$  S.E.M. and are based on gfap-Cre<sup>+</sup> control mice ( $n = 9$ ).

### gfap-Cre controls Y-maze

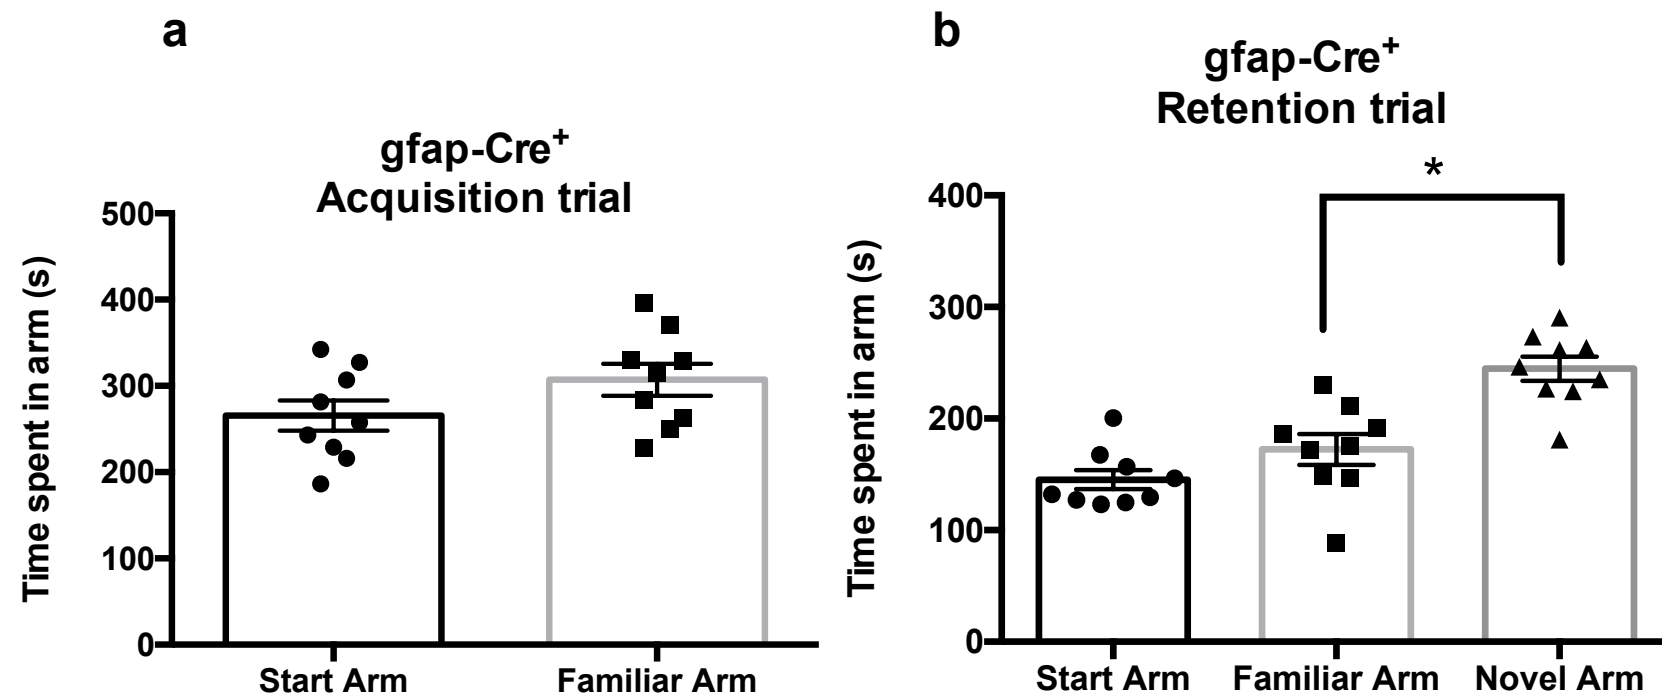

### gfap-Cre controls Morris water maze

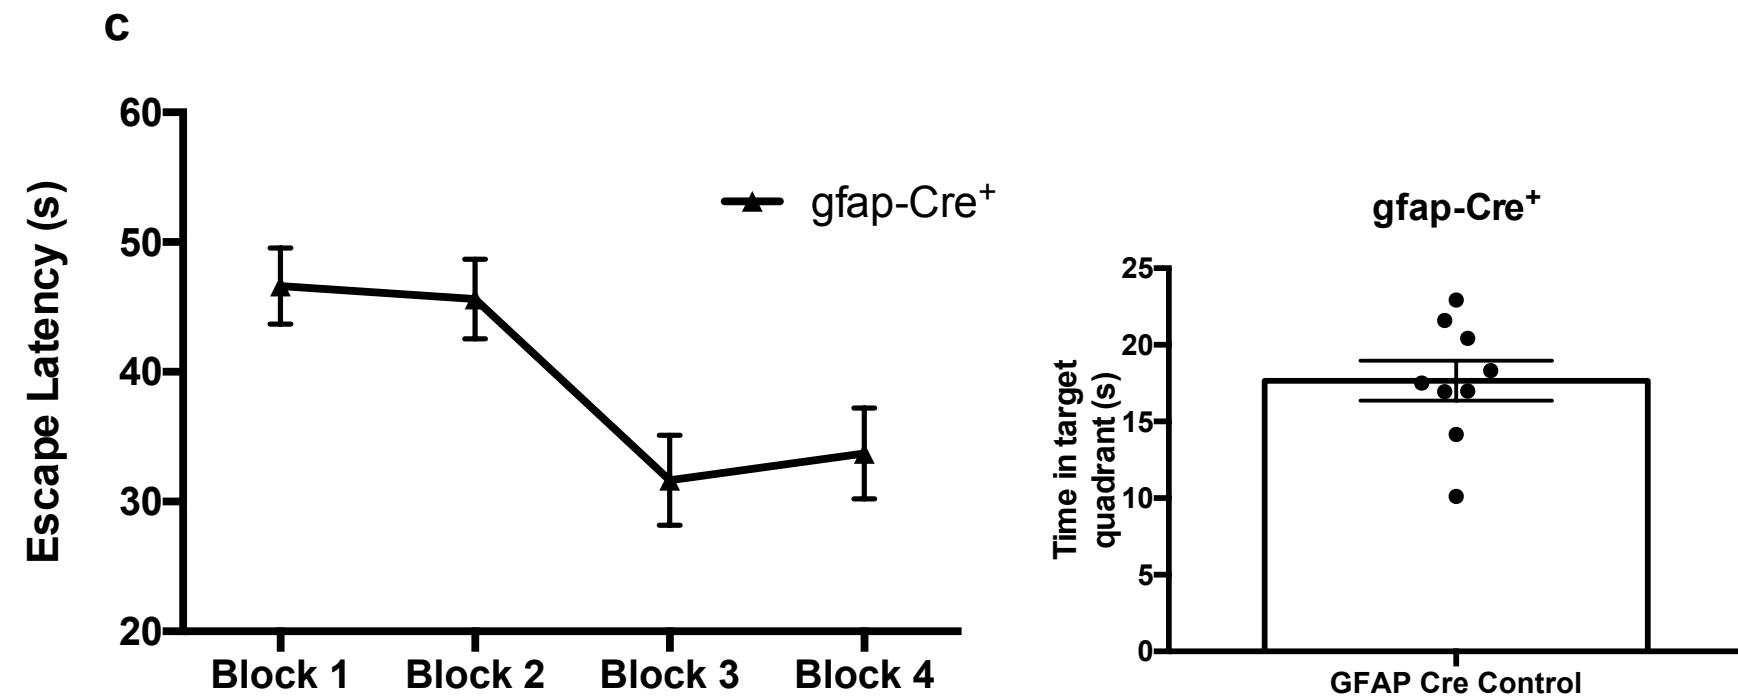

**Fig. S4. Visible platform trial in MWM suggested lack of visual acuity deficit in *gfap-Cre<sup>+</sup> EAAT2<sup>Δ/+</sup>* and *syn-Cre<sup>-</sup> EAAT2<sup>+/+</sup>* mice and their respective controls at 17 months of age.**

Latency to find the visible platform in study mice assessed in a single trial conducted on D9 after probe trial is shown. The study groups did not differ significantly in the latency (s) to find the visible platform ( $p = 0.5268$ , Kruskal-Wallis test followed by Dunn's multiple comparison test).

The data are depicted as box and whisker plots (median with interquartile range, and upper and lower extremes), and based on *gfap-Cre<sup>+</sup> EAAT2<sup>Δ/+</sup>*,  $n = 7$ ; *gfap-Cre<sup>-</sup> EAAT2<sup>+/+</sup>*,  $n = 13$ ; *syn-Cre<sup>+</sup> EAAT2<sup>-/-</sup>*,  $n = 11$ ; *syn-Cre<sup>-</sup> EAAT2<sup>+/+</sup>*,  $n = 12$ .

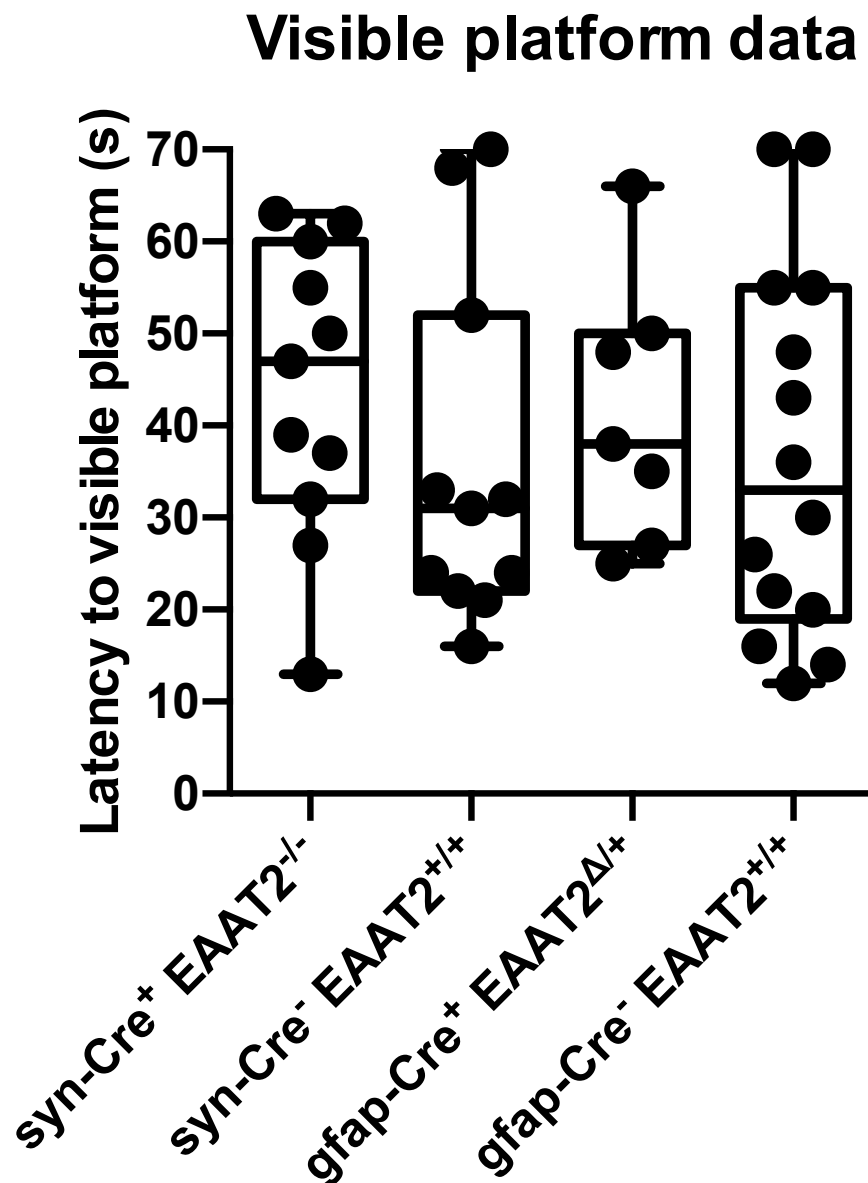

Supplement: pnas.1903566116.sapp.pdf [file pnas.1903566116.sapp.pdf]
